# Supplementary material for: A systematic study of halide-template effects in the assembly of lanthanide hydroxide cluster complexes with histidine
Source: Royal Society of Chemistry journal article supplement (doi:10.1039/d0qi01004a), 2020-09-30
Supplement: d0qi01004a1.pdf [file d0qi01004a1.pdf]

## Supporting Information

### **A systematic study of halide-template effects in the assembly of lanthanide hydroxide complexes with histidine**

Weiming Huang,<sup>a,+</sup> Zhonghao Zhang,<sup>b,+</sup> Yinglan Wu,<sup>b,+</sup> Wanmin Chen,<sup>a</sup> David A. Rotsch,<sup>c</sup> Louis Messerle,<sup>c\*</sup> and Zhiping Zheng<sup>a,b\*</sup>

a. Department of Chemistry and Shenzhen Grubbs Institute, Southern University of Science and Technology, Shenzhen 518055, China.

b. Department of Chemistry and Biochemistry, The University of Arizona, Tucson, AZ 85721, USA

c. Department of Chemistry, The University of Iowa, Iowa City, IA 52242, USA

## Contents

|                                                                                                                                                                                                                         |     |
|-------------------------------------------------------------------------------------------------------------------------------------------------------------------------------------------------------------------------|-----|
| <b>Table S1</b> Purity and source of chemical reagents used in this work.....                                                                                                                                           | S3  |
| <b>Table S2</b> Crystal data as well as details of data collection and refinement for <b>1</b> to <b>5</b> .....                                                                                                        | S4  |
| <b>Table S3</b> Crystal data as well as details of data collection and refinement for <b>6</b> to <b>10</b> .....                                                                                                       | S5  |
| <b>Fig. S1</b> The monodantate coordination mode of deprotonated histidine ligand in <b>8</b> as representative.....                                                                                                    | S6  |
| <b>Fig. S2</b> One of the deprotonated histidine ligands in <b>3</b> (front view, a) shows a unique coordination mode (b) not observed in the other clusters in this work. ....                                         | S6  |
| <b>Fig. S3</b> A fragment of two corner-shared $[\text{Er}_4(\mu_3\text{-OH})_4]^{8+}$ units in <b>10</b> with the showing of a $\mu_3\text{-}\eta^1, \eta^2, \eta^1$ mode of the side-capping histidinate ligand. .... | S7  |
| <b>Table S4</b> Selective interatomic distances (Å) and angles (deg) for <b>1-3</b> and <b>6</b> .....                                                                                                                  | S7  |
| <b>Table S5</b> Selected distances for <b>1</b> .....                                                                                                                                                                   | S8  |
| <b>Table S6</b> Selected distances for <b>2</b> .....                                                                                                                                                                   | S9  |
| <b>Table S7</b> Selected distances for <b>3</b> .....                                                                                                                                                                   | S10 |
| <b>Table S8</b> Selected distances for <b>4</b> .....                                                                                                                                                                   | S11 |
| <b>Table S9</b> Selected distances for <b>5</b> .....                                                                                                                                                                   | S12 |
| <b>Table S10</b> Selected distances for <b>6</b> .....                                                                                                                                                                  | S13 |
| <b>Table S11</b> Selected distances for <b>7</b> .....                                                                                                                                                                  | S14 |
| <b>Table S12</b> Selected distances for <b>8</b> .....                                                                                                                                                                  | S15 |
| <b>Table S13</b> Selected distances for <b>9</b> .....                                                                                                                                                                  | S16 |
| <b>Table S14</b> Selected distances for <b>10</b> .....                                                                                                                                                                 | S17 |
| <b>Fig. S4</b> The $\chi_M^{-1}$ vs $T$ and the Curie-Weiss linear fit for <b>6</b> . ....                                                                                                                              | S17 |
| <b>Fig. S5</b> The temperature dependence of in-phase ( $\chi'$ ) and out-of-phase ( $\chi''$ ) ac susceptibility data in 0 Oe and 1000 Oe dc field for <b>6</b> . ....                                                 | S18 |
| <b>Fig. S6</b> Field-dependent experimental magnetization plots for <b>6</b> at the indicated temperatures. ....                                                                                                        | S19 |

**Table S1** Purity and source of chemical reagents used in this work.

| <b>Reagent</b>                 | <b>Purity</b>  | <b>Source</b>                     |
|--------------------------------|----------------|-----------------------------------|
| Nd <sub>2</sub> O <sub>3</sub> | AR, 99.99%     | HWRK CHEM                         |
| Gd <sub>2</sub> O <sub>3</sub> | AR, 99.99%     | HWRK CHEM                         |
| Er <sub>2</sub> O <sub>3</sub> | AR, 99.99%     | HWRK CHEM                         |
| HClO <sub>4</sub>              | AR, 70.0-72.0% | Aladdin                           |
| L-Histidine                    | AR, 99%        | 9 Ding Chemistry                  |
| NaCl                           | AR, 99.5%      | Guangzhou Jinhua Chemical Reagent |
| NaBr                           | AR, 99%        | General-Reagent                   |
| NaI                            | AR, 99%        | Jiangsu Aikon CHEM                |
| NaOH                           | AR, 96%        | Damao Chemical Reagent Factory    |

**Table S2** Crystal data as well as details of data collection and refinement for **1** to **5**

|                                                                               | <b>1</b>                                                                                               | <b>2</b>                                                                                                               | <b>3</b>                                                                                                                  | <b>4</b>                                                                                              | <b>5</b>                                                                                                               |
|-------------------------------------------------------------------------------|--------------------------------------------------------------------------------------------------------|------------------------------------------------------------------------------------------------------------------------|---------------------------------------------------------------------------------------------------------------------------|-------------------------------------------------------------------------------------------------------|------------------------------------------------------------------------------------------------------------------------|
| Formula                                                                       | C <sub>90</sub> H <sub>163</sub> Cl <sub>15</sub> N <sub>45</sub><br>Nd <sub>15</sub> O <sub>106</sub> | C <sub>84</sub> H <sub>160</sub> Br <sub>4</sub> Cl <sub>11</sub><br>N <sub>42</sub> Nd <sub>15</sub> O <sub>110</sub> | C <sub>90</sub> H <sub>162</sub> Cl <sub>12</sub> I <sub>1.5</sub><br>N <sub>45</sub> Nd <sub>15</sub> O <sub>113.5</sub> | C <sub>84</sub> H <sub>152</sub> Cl <sub>15</sub> Gd <sub>15</sub><br>N <sub>42</sub> O <sub>93</sub> | C <sub>90</sub> H <sub>157</sub> Br <sub>5</sub> Cl <sub>10</sub><br>Gd <sub>15</sub> N <sub>45</sub> O <sub>106</sub> |
| Formula Weight                                                                | 6266.99                                                                                                | 6391.72                                                                                                                | 6469.99                                                                                                                   | 6128.97                                                                                               | 6678.4                                                                                                                 |
| Temperature(K)                                                                | 99.98                                                                                                  | 99.98                                                                                                                  | 100.02                                                                                                                    | 99.99                                                                                                 | 99.99                                                                                                                  |
| Crystal System                                                                | monoclinic                                                                                             | monoclinic                                                                                                             | monoclinic                                                                                                                | triclinic                                                                                             | monoclinic                                                                                                             |
| Space Group                                                                   | <i>P</i> 2 <sub>1</sub>                                                                                | <i>P</i> 2 <sub>1</sub>                                                                                                | <i>P</i> 2 <sub>1</sub>                                                                                                   | <i>P</i> 1                                                                                            | <i>C</i> 2                                                                                                             |
| <i>a</i> (Å)                                                                  | 18.5339(14)                                                                                            | 18.6802(13)                                                                                                            | 17.3647(18)                                                                                                               | 17.5188(10)                                                                                           | 20.5426(8)                                                                                                             |
| <i>b</i> (Å)                                                                  | 31.828(3)                                                                                              | 31.9692(18)                                                                                                            | 31.613(3)                                                                                                                 | 18.4535(9)                                                                                            | 30.5938(12)                                                                                                            |
| <i>c</i> (Å)                                                                  | 19.0479(16)                                                                                            | 19.1153(12)                                                                                                            | 18.823(2)                                                                                                                 | 18.5247(9)                                                                                            | 33.6496(16)                                                                                                            |
| $\alpha$ (°)                                                                  | 90                                                                                                     | 90                                                                                                                     | 90                                                                                                                        | 66.794(2)                                                                                             | 90                                                                                                                     |
| $\beta$ (°)                                                                   | 106.292(2)                                                                                             | 106.950(3)                                                                                                             | 91.431(4)                                                                                                                 | 78.846(2)                                                                                             | 98.4455(13)                                                                                                            |
| $\gamma$ (°)                                                                  | 90                                                                                                     | 90                                                                                                                     | 90                                                                                                                        | 88.209(2)                                                                                             | 90                                                                                                                     |
| Volume(Å <sup>3</sup> )                                                       | 10785.2(15)                                                                                            | 10919.6(12)                                                                                                            | 10329.9(19)                                                                                                               | 5393.5(5)                                                                                             | 20918.6(15)                                                                                                            |
| <i>Z</i>                                                                      | 2                                                                                                      | 2                                                                                                                      | 2                                                                                                                         | 1                                                                                                     | 4                                                                                                                      |
| <i>D</i> <sub>calcd</sub> (g/cm <sup>3</sup> )                                | 1.93                                                                                                   | 1.944                                                                                                                  | 2.08                                                                                                                      | 1.887                                                                                                 | 2.121                                                                                                                  |
| $\mu$ (mm <sup>-1</sup> )                                                     | 3.823                                                                                                  | 4.458                                                                                                                  | 4.181                                                                                                                     | 4.813                                                                                                 | 5.865                                                                                                                  |
| <i>F</i> (000)                                                                | 6042                                                                                                   | 6130                                                                                                                   | 6217                                                                                                                      | 2909                                                                                                  | 12660                                                                                                                  |
| Crystal size(mm <sup>3</sup> )                                                | 0.24 × 0.11 ×<br>0.08                                                                                  | 0.16 × 0.12 ×<br>0.08                                                                                                  | 0.18 × 0.12 ×<br>0.1                                                                                                      | 0.24 × 0.22 ×<br>0.07                                                                                 | 0.15 × 0.1 ×<br>0.08                                                                                                   |
| Radiation                                                                     | MoK $\alpha$                                                                                           | MoK $\alpha$                                                                                                           | MoK $\alpha$                                                                                                              | MoK $\alpha$                                                                                          | MoK $\alpha$                                                                                                           |
| Reflections<br>Collected                                                      | 288440                                                                                                 | 182775                                                                                                                 | 185873                                                                                                                    | 181651                                                                                                | 134746                                                                                                                 |
| Independent Ref.                                                              | 49518                                                                                                  | 50179                                                                                                                  | 47449                                                                                                                     | 49411                                                                                                 | 47860                                                                                                                  |
| ( <i>R</i> <sub>int</sub> )                                                   | [ <i>R</i> <sub>int</sub> = 0.0258]                                                                    | [ <i>R</i> <sub>int</sub> = 0.0678]                                                                                    | [ <i>R</i> <sub>int</sub> = 0.0448]                                                                                       | [ <i>R</i> <sub>int</sub> = 0.0265]                                                                   | [ <i>R</i> <sub>int</sub> = 0.0613]                                                                                    |
| Final <i>R</i> indexes<br>[ <i>I</i> ≥ 2σ( <i>I</i> )] <sup><i>a, b</i></sup> | <i>R</i> <sub>1</sub> = 0.0341,<br><i>wR</i> <sub>2</sub> = 0.0971                                     | <i>R</i> <sub>1</sub> = 0.0458,<br><i>wR</i> <sub>2</sub> = 0.1228                                                     | <i>R</i> <sub>1</sub> = 0.0364,<br><i>wR</i> <sub>2</sub> = 0.1019                                                        | <i>R</i> <sub>1</sub> = 0.0337,<br><i>wR</i> <sub>2</sub> = 0.0948                                    | <i>R</i> <sub>1</sub> = 0.0578,<br><i>wR</i> <sub>2</sub> = 0.1329                                                     |
| Final <i>R</i> indexes<br>[all data] <sup><i>a, b</i></sup>                   | <i>R</i> <sub>1</sub> = 0.0348,<br><i>wR</i> <sub>2</sub> = 0.0977                                     | <i>R</i> <sub>1</sub> = 0.0521,<br><i>wR</i> <sub>2</sub> = 0.1281                                                     | <i>R</i> <sub>1</sub> = 0.0369,<br><i>wR</i> <sub>2</sub> = 0.1023                                                        | <i>R</i> <sub>1</sub> = 0.0348,<br><i>wR</i> <sub>2</sub> = 0.0960                                    | <i>R</i> <sub>1</sub> = 0.0697,<br><i>wR</i> <sub>2</sub> = 0.1389                                                     |
| Goodness-of-fit<br>on <i>F</i> <sup>2</sup>                                   | 1.028                                                                                                  | 1.025                                                                                                                  | 1.051                                                                                                                     | 1.026                                                                                                 | 1.018                                                                                                                  |
| Flack parameter                                                               | 0.017(10)                                                                                              | 0.069(13)                                                                                                              | 0.061(11)                                                                                                                 | 0.049(9)                                                                                              | 0.050(16)                                                                                                              |
| CCDC number                                                                   | 2015727                                                                                                | 2015728                                                                                                                | 2015729                                                                                                                   | 2015730                                                                                               | 2015731                                                                                                                |

$${}^a R_1 = \frac{\sum ||F_o| - |F_c||}{\sum |F_o|} \quad {}^b wR_2 = \left\{ \frac{\sum [w(F_o^2 - F_c^2)^2]}{\sum [w(F_o^2)^2]} \right\}^{1/2}$$

**Table S3** Crystal data as well as details of data collection and refinement for **6** to **10**

|                                                     | <b>6</b>                                                                                                              | <b>7</b>                                                                                                                  | <b>8</b>                                                                                               | <b>9</b>                                                                                                               | <b>10</b>                                                                                                             |
|-----------------------------------------------------|-----------------------------------------------------------------------------------------------------------------------|---------------------------------------------------------------------------------------------------------------------------|--------------------------------------------------------------------------------------------------------|------------------------------------------------------------------------------------------------------------------------|-----------------------------------------------------------------------------------------------------------------------|
| Formula                                             | C <sub>48</sub> H <sub>120</sub> Cl <sub>10</sub> Gd <sub>12</sub><br>I <sub>2</sub> N <sub>24</sub> O <sub>110</sub> | C <sub>84</sub> H <sub>154</sub> Cl <sub>10</sub> Gd <sub>15</sub><br>I <sub>4.5</sub> N <sub>42</sub> O <sub>100.5</sub> | C <sub>84</sub> H <sub>148</sub> Cl <sub>15</sub> Er <sub>15</sub><br>N <sub>42</sub> O <sub>107</sub> | C <sub>84</sub> H <sub>148</sub> Br <sub>5</sub> Cl <sub>10</sub><br>Er <sub>15</sub> N <sub>42</sub> O <sub>110</sub> | C <sub>48</sub> H <sub>120</sub> Cl <sub>10</sub> Er <sub>12</sub><br>I <sub>2</sub> N <sub>24</sub> O <sub>106</sub> |
| Formula Weight                                      | 5288.97                                                                                                               | 6644.78                                                                                                                   | 6499.08                                                                                                | 6769.38                                                                                                                | 5345.09                                                                                                               |
| Temperature(K)                                      | 100.02                                                                                                                | 99.99                                                                                                                     | 100.02                                                                                                 | 99.99                                                                                                                  | 99.99                                                                                                                 |
| Crystal System                                      | tetragonal                                                                                                            | orthorhombic                                                                                                              | monoclinic                                                                                             | orthorhombic                                                                                                           | tetragonal                                                                                                            |
| Space Group                                         | <i>P</i> 4 <sub>2</sub> <sub>1</sub> 2                                                                                | <i>P</i> 2 <sub>1</sub> 2 <sub>1</sub> 2 <sub>1</sub>                                                                     | <i>P</i> 2 <sub>1</sub>                                                                                | <i>C</i> 222 <sub>1</sub>                                                                                              | <i>P</i> 4 <sub>2</sub> <sub>1</sub> 2                                                                                |
| <i>a</i> (Å)                                        | 21.9575(12)                                                                                                           | 19.544(3)                                                                                                                 | 17.242(2)                                                                                              | 18.1758(5)                                                                                                             | 21.9494(8)                                                                                                            |
| <i>b</i> (Å)                                        | 21.9575(12)                                                                                                           | 31.669(5)                                                                                                                 | 35.945(4)                                                                                              | 29.6838(9)                                                                                                             | 21.9494(8)                                                                                                            |
| <i>c</i> (Å)                                        | 18.8536(9)                                                                                                            | 34.405(5)                                                                                                                 | 17.279(2)                                                                                              | 36.2340(11)                                                                                                            | 18.7742(6)                                                                                                            |
| <i>α</i> (°)                                        | 90                                                                                                                    | 90                                                                                                                        | 90                                                                                                     | 90                                                                                                                     | 90                                                                                                                    |
| <i>β</i> (°)                                        | 90                                                                                                                    | 90                                                                                                                        | 116.095(4)                                                                                             | 90                                                                                                                     | 90                                                                                                                    |
| <i>γ</i> (°)                                        | 90                                                                                                                    | 90                                                                                                                        | 90                                                                                                     | 90                                                                                                                     | 90                                                                                                                    |
| Volume(Å <sup>3</sup> )                             | 9089.9(11)                                                                                                            | 21294(5)                                                                                                                  | 9617.4(19)                                                                                             | 19549.2(10)                                                                                                            | 9045.0(7)                                                                                                             |
| <i>Z</i>                                            | 2                                                                                                                     | 4                                                                                                                         | 2                                                                                                      | 4                                                                                                                      | 2                                                                                                                     |
| <i>D</i> <sub>calcd</sub> (g/cm <sup>3</sup> )      | 1.932                                                                                                                 | 2.073                                                                                                                     | 2.244                                                                                                  | 2.3                                                                                                                    | 1.963                                                                                                                 |
| <i>μ</i> (mm <sup>-1</sup> )                        | 4.896                                                                                                                 | 5.47                                                                                                                      | 6.78                                                                                                   | 7.627                                                                                                                  | 6.085                                                                                                                 |
| <i>F</i> (000)                                      | 5000                                                                                                                  | 12498                                                                                                                     | 6154                                                                                                   | 12764                                                                                                                  | 5032                                                                                                                  |
| Crystal size(mm <sup>3</sup> )                      | 0.08 × 0.06 ×<br>0.04                                                                                                 | 0.18 × 0.1 ×<br>0.08                                                                                                      | 0.17 × 0.13 ×<br>0.1                                                                                   | 0.17 × 0.14 ×<br>0.1                                                                                                   | 0.15 × 0.12 ×<br>0.1                                                                                                  |
| Radiation                                           | MoK <sub>α</sub>                                                                                                      | MoK <sub>α</sub>                                                                                                          | MoK <sub>α</sub>                                                                                       | MoK <sub>α</sub>                                                                                                       | MoK <sub>α</sub>                                                                                                      |
| Reflections<br>Collected                            | 72573                                                                                                                 | 326979                                                                                                                    | 267523                                                                                                 | 132009                                                                                                                 | 61367                                                                                                                 |
| Independent Ref.                                    | 9310                                                                                                                  | 43700                                                                                                                     | 44348                                                                                                  | 22479                                                                                                                  | 9277                                                                                                                  |
| ( <i>R</i> <sub>int</sub> )                         | [ <i>R</i> <sub>int</sub> = 0.0661]                                                                                   | [ <i>R</i> <sub>int</sub> = 0.0812]                                                                                       | [ <i>R</i> <sub>int</sub> = 0.0680]                                                                    | [ <i>R</i> <sub>int</sub> = 0.0463]                                                                                    | [ <i>R</i> <sub>int</sub> = 0.0444]                                                                                   |
| Final <i>R</i> indexes                              | <i>R</i> <sub>1</sub> = 0.0421,                                                                                       | <i>R</i> <sub>1</sub> = 0.0761,                                                                                           | <i>R</i> <sub>1</sub> = 0.0656,                                                                        | <i>R</i> <sub>1</sub> = 0.0379,                                                                                        | <i>R</i> <sub>1</sub> = 0.0353,                                                                                       |
| [ <i>I</i> ≥ 2σ( <i>I</i> )] <sup><i>a, b</i></sup> | <i>wR</i> <sub>2</sub> = 0.1149                                                                                       | <i>wR</i> <sub>2</sub> = 0.1992                                                                                           | <i>wR</i> <sub>2</sub> = 0.1554                                                                        | <i>wR</i> <sub>2</sub> = 0.1015                                                                                        | <i>wR</i> <sub>2</sub> = 0.0990                                                                                       |
| Final <i>R</i> indexes                              | <i>R</i> <sub>1</sub> = 0.0475,                                                                                       | <i>R</i> <sub>1</sub> = 0.0908,                                                                                           | <i>R</i> <sub>1</sub> = 0.0692,                                                                        | <i>R</i> <sub>1</sub> = 0.0417,                                                                                        | <i>R</i> <sub>1</sub> = 0.0412,                                                                                       |
| [all data] <sup><i>a, b</i></sup>                   | <i>wR</i> <sub>2</sub> = 0.1203                                                                                       | <i>wR</i> <sub>2</sub> = 0.2114                                                                                           | <i>wR</i> <sub>2</sub> = 0.1571                                                                        | <i>wR</i> <sub>2</sub> = 0.1044                                                                                        | <i>wR</i> <sub>2</sub> = 0.1035                                                                                       |
| Goodness-of-fit<br>on <i>F</i> <sup>2</sup>         | 1.046                                                                                                                 | 1.016                                                                                                                     | 1.134                                                                                                  | 1.058                                                                                                                  | 1.05                                                                                                                  |
| Flack parameter                                     | 0.021(8)                                                                                                              | 0.11(2)                                                                                                                   | 0.099(17)                                                                                              | 0.033(14)                                                                                                              | 0.015(6)                                                                                                              |
| CCDC number                                         | 2015732                                                                                                               | 2015733                                                                                                                   | 2015734                                                                                                | 2015735                                                                                                                | 2015736                                                                                                               |

$${}^a R_1 = \frac{\sum ||F_o| - |F_c||}{\sum |F_o|} \quad {}^b wR_2 = \left\{ \frac{\sum [w(F_o^2 - F_c^2)^2]}{\sum [w(F_o^2)]} \right\}^{1/2}$$

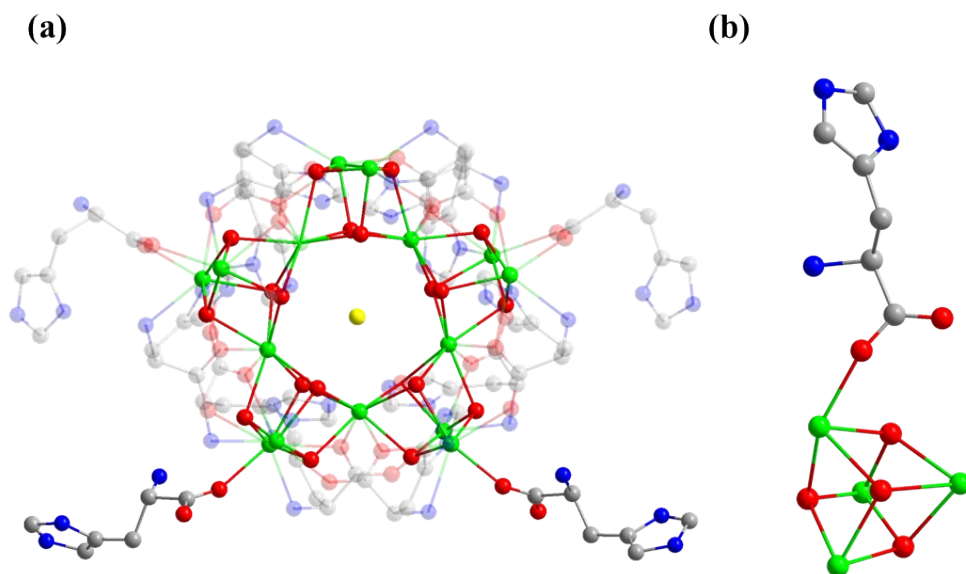

**Fig. S1** The monodantate coordination mode of deprotonated histidine ligand in **8** as representative. Color legends: C, gray; N, blue; O, red; Nd, green; Cl, yellow (H atoms are discarded for clarity).

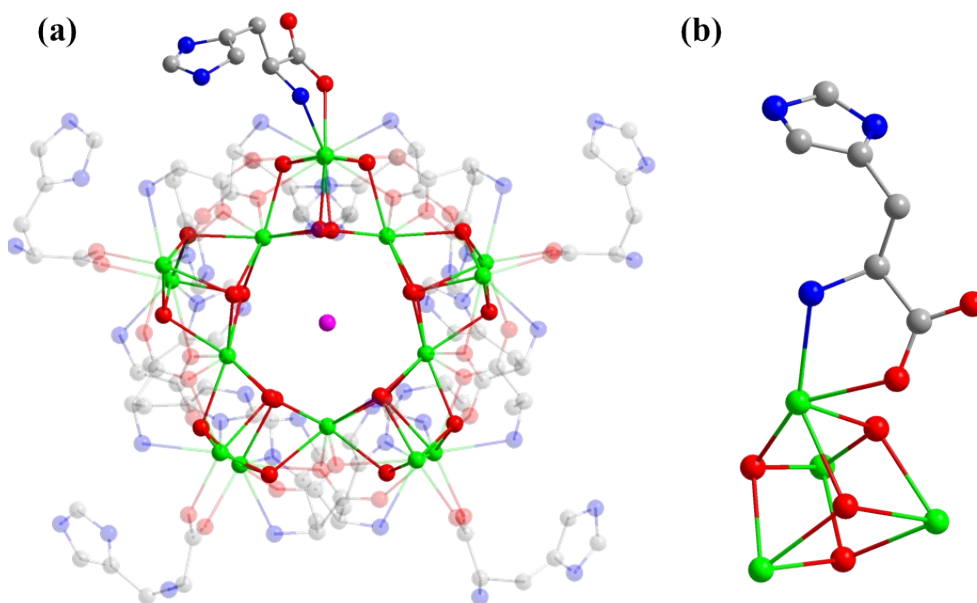

**Fig. S2** One of the deprotonated histidine ligands in **3** (front view, a) shows a unique coordination mode (b) not observed in the other clusters in this work. Color legends: C, grey; N, blue; O, red; Er, green; I, purple (H atoms are discarded for clarity).

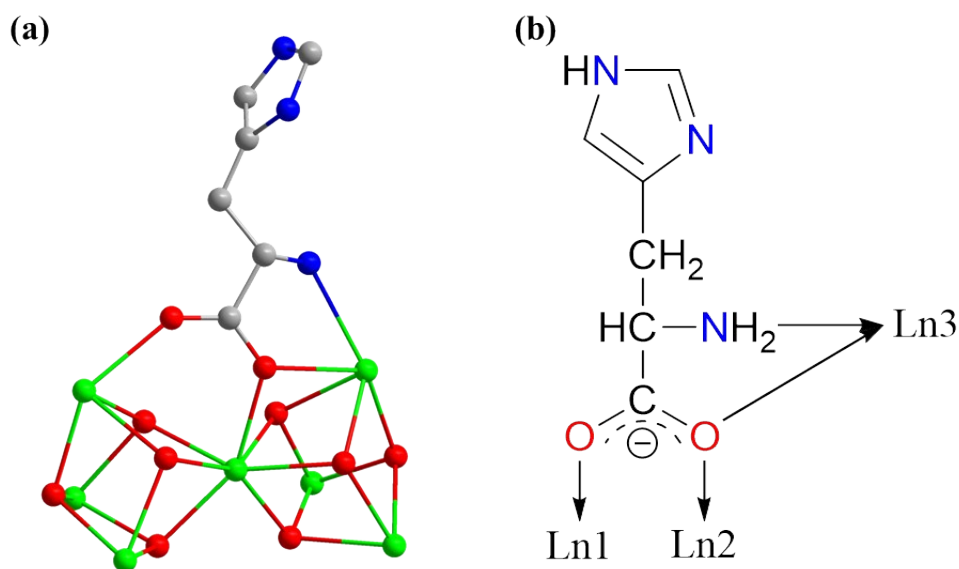

**Fig. S3** A fragment of two corner-shared  $[\text{Er}_4(\mu_3\text{-OH})_4]^{8+}$  units in **10** with the showing of a  $\mu_3:\eta^1, \eta^2, \eta^1$  mode of the side-capping histidinate ligand. Color legends: C, grey; N, blue; O, red; Er, green (H atoms are discarded for clarity).

**Table S4** Selective interatomic distances ( $\text{\AA}$ ) and angles (deg) for **1-3** and **6**

| Complex                            | 1                  | 2                   | 3                   | 6                   |
|------------------------------------|--------------------|---------------------|---------------------|---------------------|
| Ln-O( $\mu_3$ -OH)                 | 2.403(6)-2.516(5)  | 2.418(7)-2.504(9)   | 2.423(6)-2.509(7)   | 2.303(9)-2.406(8)   |
| Average                            | 2.456              | 2.459               | 2.466               | 2.347               |
| Ln-O (carboxylato)                 | 2.402(7)-2.614(7)  | 2.340(2)-2.620(8)   | 2.409(9)-2.625(8)   | 2.358(8)-2.520(9)   |
| Average                            | 2.512              | 2.514               | 2.512               | 2.440               |
| Ln-N                               | 2.562(12)-2.657(8) | 2.576(15)-2.660(12) | 2.660(10)-2.528(15) | 2.554(12)-2.566(10) |
| Average                            | 2.614              | 2.613               | 2.615               | 2.560               |
| Ln-O( $\mu_3$ -OH)-Ln              | 99.9(2)-112.0(2)   | 98.4(3)-111.8(4)    | 98.4(2)-112.5(3)    | 97.1(3)-110.0(3)    |
| Average                            | 105.8              | 106.0               | 106.0               | 105.0               |
| O( $\mu_3$ -OH)-Ln-O( $\mu_3$ -OH) | 66.7(2)-75.8(2)    | 66.4(3)-74.8(3)     | 65.9(3)-75.3(2)     | 68.8(3)-76.7(3)     |
| Average                            | 71.1               | 70.8                | 70.8                | 72.2                |

**Table S5** Selected distances for **1**

| Atom1 | Atom2 | Distance/Å | Atom1 | Atom2 | Distance/Å | Atom1 | Atom2 | Distance/Å |
|-------|-------|------------|-------|-------|------------|-------|-------|------------|
| Nd1   | O1    | 2.521(6)   | Nd6   | O6Q   | 2.467(6)   | Nd11  | O8    | 2.480(7)   |
| Nd1   | O1Q   | 2.426(6)   | Nd6   | O7Q   | 2.476(6)   | Nd11  | O9    | 2.553(6)   |
| Nd1   | O2Q   | 2.470(5)   | Nd6   | O8Q   | 2.451(6)   | Nd11  | O13Q  | 2.428(6)   |
| Nd1   | O3Q   | 2.436(6)   | Nd6   | O18   | 2.483(7)   | Nd11  | O15Q  | 2.431(6)   |
| Nd1   | O11   | 2.535(6)   | Nd6   | O19   | 2.589(6)   | Nd11  | O16Q  | 2.421(6)   |
| Nd1   | O17Q  | 2.462(5)   | Nd6   | O24   | 2.467(8)   | Nd11  | O27   | 2.407(7)   |
| Nd1   | O18Q  | 2.403(6)   | Nd6   | N28   | 2.620(10)  | Nd11  | N13   | 2.586(8)   |
| Nd1   | O20Q  | 2.475(6)   | Nd6   | N29   | 2.645(10)  | Nd11  | N14   | 2.622(9)   |
| Nd2   | O1Q   | 2.434(6)   | Nd7   | O5    | 2.497(6)   | Nd12  | O14   | 2.489(7)   |
| Nd2   | O2    | 2.490(7)   | Nd7   | O5Q   | 2.478(6)   | Nd12  | O14Q  | 2.474(6)   |
| Nd2   | O3    | 2.545(6)   | Nd7   | O6Q   | 2.412(6)   | Nd12  | O15   | 2.590(6)   |
| Nd2   | O3Q   | 2.439(6)   | Nd7   | O8Q   | 2.491(6)   | Nd12  | O15Q  | 2.468(6)   |
| Nd2   | O4Q   | 2.457(6)   | Nd7   | O9Q   | 2.431(6)   | Nd12  | O16Q  | 2.452(6)   |
| Nd2   | O21   | 2.402(7)   | Nd7   | O10Q  | 2.468(6)   | Nd12  | O28   | 2.499(9)   |
| Nd2   | N4    | 2.614(11)  | Nd7   | O11Q  | 2.494(6)   | Nd12  | N22   | 2.640(10)  |
| Nd2   | N5    | 2.562(12)  | Nd7   | O17   | 2.490(6)   | Nd12  | N23   | 2.611(10)  |
| Nd3   | O2Q   | 2.454(5)   | Nd8   | O6    | 2.501(9)   | Nd13  | O9    | 2.562(6)   |
| Nd3   | O3Q   | 2.466(6)   | Nd8   | O7    | 2.614(7)   | Nd13  | O13   | 2.512(6)   |
| Nd3   | O4Q   | 2.446(6)   | Nd8   | O9Q   | 2.463(6)   | Nd13  | O13Q  | 2.459(6)   |
| Nd3   | O11   | 2.591(6)   | Nd8   | O11Q  | 2.456(7)   | Nd13  | O14Q  | 2.420(6)   |
| Nd3   | O20   | 2.462(7)   | Nd8   | O12Q  | 2.469(7)   | Nd13  | O16Q  | 2.509(6)   |
| Nd3   | O22   | 2.519(7)   | Nd8   | O25   | 2.427(9)   | Nd13  | O17Q  | 2.427(5)   |
| Nd3   | N16   | 2.599(8)   | Nd8   | N10   | 2.645(10)  | Nd13  | O18Q  | 2.480(6)   |
| Nd3   | N17   | 2.657(8)   | Nd8   | N11   | 2.603(13)  | Nd13  | O19Q  | 2.466(7)   |
| Nd4   | O1Q   | 2.463(6)   | Nd9   | O10Q  | 2.472(5)   | Nd14  | O1    | 2.581(6)   |
| Nd4   | O2Q   | 2.452(6)   | Nd9   | O11Q  | 2.465(7)   | Nd14  | O10   | 2.470(7)   |
| Nd4   | O3    | 2.573(6)   | Nd9   | O12Q  | 2.451(7)   | Nd14  | O17Q  | 2.465(5)   |
| Nd4   | O4Q   | 2.516(5)   | Nd9   | O16   | 2.487(8)   | Nd14  | O19Q  | 2.450(7)   |
| Nd4   | O5Q   | 2.422(6)   | Nd9   | O17   | 2.578(6)   | Nd14  | O20Q  | 2.452(6)   |
| Nd4   | O6Q   | 2.487(6)   | Nd9   | O26   | 2.463(9)   | Nd14  | O29   | 2.478(8)   |
| Nd4   | O7Q   | 2.445(6)   | Nd9   | N25   | 2.648(10)  | Nd14  | N1    | 2.632(9)   |
| Nd4   | O19   | 2.515(6)   | Nd9   | N26   | 2.597(10)  | Nd14  | N2    | 2.605(9)   |
| Nd5   | O4    | 2.510(8)   | Nd10  | O7    | 2.550(6)   | Nd15  | O12   | 2.505(6)   |
| Nd5   | O5    | 2.572(7)   | Nd10  | O9Q   | 2.463(6)   | Nd15  | O13   | 2.594(6)   |
| Nd5   | O5Q   | 2.463(6)   | Nd10  | O10Q  | 2.417(6)   | Nd15  | O18Q  | 2.445(6)   |
| Nd5   | O7Q   | 2.461(7)   | Nd10  | O12Q  | 2.454(6)   | Nd15  | O19Q  | 2.443(6)   |
| Nd5   | O8Q   | 2.451(6)   | Nd10  | O13Q  | 2.410(6)   | Nd15  | O20Q  | 2.457(6)   |
| Nd5   | O23   | 2.433(7)   | Nd10  | O14Q  | 2.474(6)   | Nd15  | O30   | 2.407(8)   |
| Nd5   | N7    | 2.639(10)  | Nd10  | O15   | 2.539(6)   | Nd15  | N19   | 2.592(9)   |
| Nd5   | N8    | 2.576(10)  | Nd10  | O15Q  | 2.461(6)   | Nd15  | N20   | 2.581(9)   |



**Table S6** Selected distances for **2**

| <b>Atom1</b> | <b>Atom2</b> | <b>Distance/Å</b> | <b>Atom1</b> | <b>Atom2</b> | <b>Distance/Å</b> | <b>Atom1</b> | <b>Atom2</b> | <b>Distance/Å</b> |
|--------------|--------------|-------------------|--------------|--------------|-------------------|--------------|--------------|-------------------|
| Nd13         | O13          | 2.538(9)          | Nd1          | O2Q          | 2.494(8)          | Nd3          | O2Q          | 2.442(8)          |
| Nd13         | O18Q         | 2.471(8)          | Nd1          | O18Q         | 2.450(8)          | Nd3          | O11          | 2.565(9)          |
| Nd13         | O9           | 2.534(8)          | Nd1          | O1Q          | 2.434(9)          | Nd3          | O20          | 2.486(9)          |
| Nd13         | O14Q         | 2.420(7)          | Nd1          | O11          | 2.507(8)          | Nd3          | O22          | 2.481(10)         |
| Nd13         | O19Q         | 2.445(8)          | Nd1          | O20Q         | 2.490(8)          | Nd3          | O4Q          | 2.460(10)         |
| Nd13         | O13Q         | 2.487(7)          | Nd1          | O1           | 2.559(8)          | Nd3          | O3Q          | 2.468(9)          |
| Nd13         | O16Q         | 2.484(8)          | Nd1          | O3Q          | 2.458(8)          | Nd3          | N18          | 2.618(14)         |
| Nd13         | O17Q         | 2.436(8)          | Nd1          | O17Q         | 2.475(8)          | Nd3          | N17          | 2.638(14)         |
| Nd15         | O13          | 2.577(8)          | Nd14         | O29          | 2.423(10)         | Nd2          | O1Q          | 2.453(8)          |
| Nd15         | O18Q         | 2.455(8)          | Nd14         | O10          | 2.494(9)          | Nd2          | O2           | 2.496(11)         |
| Nd15         | O12          | 2.489(10)         | Nd14         | O20Q         | 2.454(9)          | Nd2          | O21          | 2.437(10)         |
| Nd15         | O30          | 2.476(10)         | Nd14         | O1           | 2.587(8)          | Nd2          | O3           | 2.585(10)         |
| Nd15         | O20Q         | 2.456(9)          | Nd14         | O19Q         | 2.447(8)          | Nd2          | O4Q          | 2.452(9)          |
| Nd15         | O19Q         | 2.466(8)          | Nd14         | O17Q         | 2.451(7)          | Nd2          | O3Q          | 2.445(10)         |
| Nd15         | N20          | 2.654(11)         | Nd14         | N3           | 2.618(12)         | Nd2          | N6           | 2.608(13)         |
| Nd15         | N21          | 2.626(12)         | Nd14         | N2           | 2.576(15)         | Nd2          | N5           | 2.582(15)         |
| Nd10         | O15          | 2.518(7)          | Nd11         | O27          | 2.446(10)         | Nd9          | O17          | 2.607(9)          |
| Nd10         | O7           | 2.555(9)          | Nd11         | O9           | 2.580(8)          | Nd9          | O10Q         | 2.461(7)          |
| Nd10         | O15Q         | 2.453(8)          | Nd11         | O15Q         | 2.471(8)          | Nd9          | O12Q         | 2.462(8)          |
| Nd10         | O14Q         | 2.475(8)          | Nd11         | O8           | 2.482(8)          | Nd9          | O16          | 2.495(9)          |
| Nd10         | O10Q         | 2.434(7)          | Nd11         | O13Q         | 2.441(8)          | Nd9          | O26          | 2.34(2)           |
| Nd10         | O13Q         | 2.418(7)          | Nd11         | O16Q         | 2.472(8)          | Nd9          | O11Q         | 2.462(9)          |
| Nd10         | O9Q          | 2.474(7)          | Nd11         | N15          | 2.618(11)         | Nd9          | N26          | 2.585(13)         |
| Nd10         | O12Q         | 2.490(8)          | Nd11         | N14          | 2.635(13)         | Nd9          | N27          | 2.634(12)         |
| Nd12         | O14          | 2.495(8)          | Nd7          | O5           | 2.531(8)          | Nd5          | O23          | 2.49(2)           |
| Nd12         | O15          | 2.620(8)          | Nd7          | O17          | 2.530(8)          | Nd5          | O5           | 2.599(9)          |
| Nd12         | O15Q         | 2.453(8)          | Nd7          | O10Q         | 2.475(7)          | Nd5          | O7Q          | 2.439(10)         |
| Nd12         | O14Q         | 2.458(7)          | Nd7          | O9Q          | 2.427(8)          | Nd5          | O4           | 2.484(13)         |
| Nd12         | O28          | 2.430(11)         | Nd7          | O8Q          | 2.456(8)          | Nd5          | O8Q          | 2.469(9)          |
| Nd12         | O16Q         | 2.435(8)          | Nd7          | O11Q         | 2.470(9)          | Nd5          | O5Q          | 2.457(8)          |
| Nd12         | N23          | 2.608(11)         | Nd7          | O6Q          | 2.435(9)          | Nd5          | N9           | 2.639(15)         |
| Nd12         | N24          | 2.582(11)         | Nd7          | O5Q          | 2.473(8)          | Nd5          | N8           | 2.579(16)         |
| Nd4          | O2Q          | 2.437(9)          | Nd8          | O25          | 2.54(3)           | Nd6          | O24          | 2.42(2)           |
| Nd4          | O19          | 2.503(8)          | Nd8          | O6           | 2.488(9)          | Nd6          | O19          | 2.556(9)          |
| Nd4          | O1Q          | 2.483(8)          | Nd8          | O7           | 2.569(8)          | Nd6          | O18          | 2.517(10)         |
| Nd4          | O3           | 2.512(9)          | Nd8          | O9Q          | 2.435(8)          | Nd6          | O7Q          | 2.477(10)         |
| Nd4          | O7Q          | 2.504(9)          | Nd8          | O12Q         | 2.431(8)          | Nd6          | O8Q          | 2.477(9)          |
| Nd4          | O6Q          | 2.474(8)          | Nd8          | O11Q         | 2.444(9)          | Nd6          | O6Q          | 2.450(8)          |
| Nd4          | O4Q          | 2.503(9)          | Nd8          | N12          | 2.593(10)         | Nd6          | N29          | 2.585(13)         |
| Nd4          | O5Q          | 2.447(9)          | Nd8          | N11          | 2.617(12)         | Nd6          | N30          | 2.660(12)         |

**Table S7** Selected distances for **3**

| <b>Atom1</b> | <b>Atom2</b> | <b>Distance/Å</b> | <b>Atom1</b> | <b>Atom2</b> | <b>Distance/Å</b> | <b>Atom1</b> | <b>Atom2</b> | <b>Distance/Å</b> |
|--------------|--------------|-------------------|--------------|--------------|-------------------|--------------|--------------|-------------------|
| Nd1          | O1           | 2.479(7)          | Nd6          | O6Q          | 2.446(6)          | Nd11         | O8           | 2.494(9)          |
| Nd1          | O1Q          | 2.451(7)          | Nd6          | O7Q          | 2.463(7)          | Nd11         | O9           | 2.533(9)          |
| Nd1          | O2Q          | 2.493(7)          | Nd6          | O8Q          | 2.453(7)          | Nd11         | O13Q         | 2.457(7)          |
| Nd1          | O3Q          | 2.474(7)          | Nd6          | O18          | 2.490(8)          | Nd11         | O15Q         | 2.446(7)          |
| Nd1          | O11          | 2.481(7)          | Nd6          | O19          | 2.582(7)          | Nd11         | O16Q         | 2.468(7)          |
| Nd1          | O17Q         | 2.509(7)          | Nd6          | O24          | 2.409(9)          | Nd11         | O27          | 2.423(8)          |
| Nd1          | O18Q         | 2.438(7)          | Nd6          | N29          | 2.598(10)         | Nd11         | N14          | 2.598(15)         |
| Nd1          | O20Q         | 2.462(7)          | Nd6          | N30          | 2.613(10)         | Nd11         | N15          | 2.644(11)         |
| Nd2          | O1Q          | 2.463(7)          | Nd7          | O5           | 2.540(7)          | Nd12         | O14          | 2.496(9)          |
| Nd2          | O2           | 2.519(8)          | Nd7          | O5Q          | 2.489(7)          | Nd12         | O14Q         | 2.482(7)          |
| Nd2          | O3           | 2.550(7)          | Nd7          | O6Q          | 2.444(6)          | Nd12         | O15          | 2.576(7)          |
| Nd2          | O3Q          | 2.449(7)          | Nd7          | O8Q          | 2.440(6)          | Nd12         | O15Q         | 2.470(7)          |
| Nd2          | O4Q          | 2.493(7)          | Nd7          | O9Q          | 2.434(7)          | Nd12         | O16Q         | 2.460(8)          |
| Nd2          | O21          | 2.440(8)          | Nd7          | O10Q         | 2.502(6)          | Nd12         | O28          | 2.476(8)          |
| Nd2          | N5           | 2.636(9)          | Nd7          | O11Q         | 2.432(7)          | Nd12         | N23          | 2.647(9)          |
| Nd2          | N6           | 2.629(9)          | Nd7          | O17          | 2.497(6)          | Nd12         | N24          | 2.599(10)         |
| Nd3          | O2Q          | 2.478(7)          | Nd8          | O6           | 2.517(7)          | Nd13         | O9           | 2.525(7)          |
| Nd3          | O3Q          | 2.491(7)          | Nd8          | O7           | 2.625(8)          | Nd13         | O13          | 2.471(7)          |
| Nd3          | O4Q          | 2.449(7)          | Nd8          | O9Q          | 2.449(7)          | Nd13         | O13Q         | 2.492(7)          |
| Nd3          | O11          | 2.586(7)          | Nd8          | O11Q         | 2.450(7)          | Nd13         | O14Q         | 2.447(7)          |
| Nd3          | O20          | 2.501(8)          | Nd8          | O12Q         | 2.467(7)          | Nd13         | O16Q         | 2.472(7)          |
| Nd3          | O22          | 2.460(8)          | Nd8          | O25          | 2.439(8)          | Nd13         | O17Q         | 2.423(7)          |
| Nd3          | N17          | 2.647(10)         | Nd8          | N11          | 2.528(15)         | Nd13         | O18Q         | 2.503(7)          |
| Nd3          | N18          | 2.614(10)         | Nd8          | N12          | 2.660(10)         | Nd13         | O19Q         | 2.477(8)          |
| Nd4          | O1Q          | 2.493(7)          | Nd9          | O10Q         | 2.467(7)          | Nd14         | O1           | 2.546(7)          |
| Nd4          | O2Q          | 2.448(7)          | Nd9          | O11Q         | 2.462(7)          | Nd14         | O10          | 2.500(10)         |
| Nd4          | O3           | 2.490(7)          | Nd9          | O12Q         | 2.496(7)          | Nd14         | O17Q         | 2.468(7)          |
| Nd4          | O4Q          | 2.452(6)          | Nd9          | O16          | 2.478(8)          | Nd14         | O19Q         | 2.450(8)          |
| Nd4          | O5Q          | 2.453(7)          | Nd9          | O17          | 2.617(7)          | Nd14         | O20Q         | 2.466(7)          |
| Nd4          | O6Q          | 2.494(7)          | Nd9          | O26          | 2.451(9)          | Nd14         | N2           | 2.606(10)         |
| Nd4          | O7Q          | 2.486(6)          | Nd9          | N26          | 2.610(10)         | Nd14         | N3           | 2.629(11)         |
| Nd4          | O19          | 2.495(7)          | Nd9          | N27          | 2.613(9)          | Nd15         | O12          | 2.519(8)          |
| Nd5          | O4           | 2.497(7)          | Nd10         | O7           | 2.546(8)          | Nd15         | O13          | 2.592(8)          |
| Nd5          | O5           | 2.611(7)          | Nd10         | O9Q          | 2.491(6)          | Nd15         | O18Q         | 2.491(7)          |
| Nd5          | O5Q          | 2.464(6)          | Nd10         | O10Q         | 2.423(6)          | Nd15         | O19Q         | 2.494(8)          |
| Nd5          | O7Q          | 2.451(7)          | Nd10         | O12Q         | 2.462(7)          | Nd15         | O20Q         | 2.482(8)          |
| Nd5          | O8Q          | 2.456(6)          | Nd10         | O13Q         | 2.455(7)          | Nd15         | O29          | 2.486(13)         |
| Nd5          | O23          | 2.519(9)          | Nd10         | O14Q         | 2.482(7)          | Nd15         | N20          | 2.596(13)         |
| Nd5          | N8           | 2.653(9)          | Nd10         | O15          | 2.494(7)          | Nd15         | N21          | 2.620(10)         |
| Nd5          | N9           | 2.590(9)          | Nd10         | O15Q         | 2.453(7)          | Nd15         | N45          | 2.580(15)         |

**Table S8** Selected distances for **4**

| <b>Atom1</b> | <b>Atom2</b> | <b>Distance/Å</b> | <b>Atom1</b> | <b>Atom2</b> | <b>Distance/Å</b> | <b>Atom1</b> | <b>Atom2</b> | <b>Distance/Å</b> |
|--------------|--------------|-------------------|--------------|--------------|-------------------|--------------|--------------|-------------------|
| Gd1          | O2Q          | 2.405(6)          | Gd13         | O9           | 2.474(8)          | Gd5          | O5           | 2.580(7)          |
| Gd1          | O1           | 2.430(7)          | Gd13         | O19Q         | 2.411(7)          | Gd5          | O8Q          | 2.369(5)          |
| Gd1          | O1Q          | 2.393(6)          | Gd14         | O1           | 2.590(9)          | Gd5          | O7Q          | 2.394(7)          |
| Gd1          | O3Q          | 2.436(7)          | Gd14         | O17Q         | 2.502(8)          | Gd5          | O5Q          | 2.421(6)          |
| Gd1          | O11          | 2.544(8)          | Gd14         | O10          | 2.549(13)         | Gd5          | O4           | 2.429(7)          |
| Gd1          | O17Q         | 2.405(7)          | Gd14         | O20Q         | 2.275(11)         | Gd5          | N9           | 2.555(9)          |
| Gd1          | O18Q         | 2.354(6)          | Gd15         | O13          | 2.459(8)          | Gd5          | N8           | 2.552(10)         |
| Gd1          | O20Q         | 2.394(7)          | Gd15         | O18Q         | 2.352(7)          | Gd5          | O23          | 2.447(8)          |
| Gd10         | O15          | 2.433(6)          | Gd15         | O19Q         | 2.455(9)          | Gd6          | O7Q          | 2.386(6)          |
| Gd10         | O10Q         | 2.354(5)          | Gd15         | O12          | 2.433(10)         | Gd6          | O6Q          | 2.374(6)          |
| Gd10         | O14Q         | 2.389(5)          | Gd15         | N26          | 2.452(16)         | Gd6          | O18          | 2.446(6)          |
| Gd10         | O12Q         | 2.446(6)          | Gd15         | N27          | 2.525(13)         | Gd6          | O24          | 2.340(8)          |
| Gd10         | O7           | 2.554(6)          | Gd15         | O20Q         | 2.459(9)          | Gd6          | N20          | 2.510(10)         |
| Gd10         | O9Q          | 2.404(6)          | Gd2          | Gd3          | 3.9097(7)         | Gd6          | N21          | 2.537(9)          |
| Gd10         | O13Q         | 2.380(6)          | Gd2          | O3           | 2.546(6)          | Gd7          | O5           | 2.515(6)          |
| Gd10         | O15Q         | 2.386(6)          | Gd2          | O1Q          | 2.427(5)          | Gd7          | O11Q         | 2.365(6)          |
| Gd11         | O13Q         | 2.366(6)          | Gd2          | O4Q          | 2.396(6)          | Gd7          | O17          | 2.505(6)          |
| Gd11         | O15Q         | 2.371(7)          | Gd2          | O3Q          | 2.428(7)          | Gd7          | O8Q          | 2.381(6)          |
| Gd11         | O16Q         | 2.380(7)          | Gd2          | O2           | 2.470(8)          | Gd7          | O10Q         | 2.406(5)          |
| Gd11         | O9           | 2.477(8)          | Gd2          | O21          | 2.443(8)          | Gd7          | O9Q          | 2.370(6)          |
| Gd11         | O27          | 2.311(8)          | Gd2          | N5           | 2.573(9)          | Gd7          | O5Q          | 2.417(5)          |
| Gd11         | O8           | 2.476(9)          | Gd2          | N6           | 2.568(9)          | Gd7          | O6Q          | 2.375(6)          |
| Gd11         | N15          | 2.546(10)         | Gd3          | O2Q          | 2.353(6)          | Gd8          | O11Q         | 2.413(7)          |
| Gd11         | N14          | 2.521(11)         | Gd3          | O4Q          | 2.387(6)          | Gd8          | O12Q         | 2.369(6)          |
| Gd12         | O15          | 2.530(6)          | Gd3          | O3Q          | 2.360(8)          | Gd8          | O7           | 2.513(8)          |
| Gd12         | O14Q         | 2.442(5)          | Gd3          | O11          | 2.475(8)          | Gd8          | O9Q          | 2.360(6)          |
| Gd12         | O15Q         | 2.409(7)          | Gd3          | O20          | 2.459(9)          | Gd8          | O6           | 2.418(7)          |
| Gd12         | O14          | 2.457(8)          | Gd3          | O22          | 2.348(7)          | Gd8          | O25          | 2.320(8)          |
| Gd12         | O16Q         | 2.412(7)          | Gd3          | N23          | 2.536(11)         | Gd8          | N12          | 2.556(11)         |
| Gd12         | N29          | 2.570(9)          | Gd3          | N24          | 2.560(10)         | Gd8          | N11          | 2.539(11)         |
| Gd12         | O28          | 2.491(8)          | Gd4          | O19          | 2.513(7)          | Gd9          | O11Q         | 2.383(6)          |
| Gd12         | N30          | 2.547(9)          | Gd4          | O7Q          | 2.432(6)          | Gd9          | O17          | 2.573(6)          |
| Gd13         | O14Q         | 2.391(6)          | Gd4          | O3           | 2.466(6)          | Gd9          | O10Q         | 2.428(5)          |
| Gd13         | O13Q         | 2.391(6)          | Gd4          | O2Q          | 2.376(6)          | Gd9          | O12Q         | 2.424(6)          |
| Gd13         | O13          | 2.441(7)          | Gd4          | O5Q          | 2.345(6)          | Gd9          | O16          | 2.447(6)          |
| Gd13         | O17Q         | 2.354(7)          | Gd4          | O6Q          | 2.411(6)          | Gd9          | N17          | 2.576(8)          |
| Gd13         | O16Q         | 2.450(7)          | Gd4          | O1Q          | 2.396(6)          | Gd9          | N18          | 2.514(8)          |
| Gd13         | O18Q         | 2.405(7)          | Gd4          | O4Q          | 2.376(6)          | Gd9          | O26          | 2.514(8)          |

**Table S9** Selected distances for **5**

| <b>Atom1</b> | <b>Atom2</b> | <b>Distance/Å</b> | <b>Atom1</b> | <b>Atom2</b> | <b>Distance/Å</b> | <b>Atom1</b> | <b>Atom2</b> | <b>Distance/Å</b> |
|--------------|--------------|-------------------|--------------|--------------|-------------------|--------------|--------------|-------------------|
| Gd10         | O9Q          | 2.425(12)         | Gd1          | O3Q          | 2.475(12)         | Gd12         | O15Q         | 2.401(14)         |
| Gd10         | O15Q         | 2.441(13)         | Gd1          | O2Q          | 2.426(11)         | Gd12         | O16Q         | 2.418(12)         |
| Gd10         | O7           | 2.459(13)         | Gd1          | O18Q         | 2.370(11)         | Gd12         | O15          | 2.517(13)         |
| Gd10         | O12Q         | 2.426(12)         | Gd1          | O11          | 2.532(12)         | Gd12         | O14Q         | 2.389(11)         |
| Gd10         | O15          | 2.444(13)         | Gd1          | O20Q         | 2.401(11)         | Gd12         | O14          | 2.430(14)         |
| Gd10         | O14Q         | 2.409(13)         | Gd1          | O1Q          | 2.348(12)         | Gd12         | O28          | 2.304(16)         |
| Gd10         | O13Q         | 2.332(13)         | Gd1          | O17Q         | 2.398(12)         | Gd12         | N23          | 2.58(2)           |
| Gd10         | O10Q         | 2.373(12)         | Gd1          | O1           | 2.407(14)         | Gd12         | N22          | 2.52(2)           |
| Gd6          | O7Q          | 2.366(12)         | Gd15         | O18Q         | 2.355(11)         | Gd3          | O3Q          | 2.361(12)         |
| Gd6          | O18          | 2.416(12)         | Gd15         | O20Q         | 2.374(12)         | Gd3          | O2Q          | 2.347(12)         |
| Gd6          | O6Q          | 2.425(11)         | Gd15         | O19Q         | 2.379(12)         | Gd3          | O11          | 2.510(13)         |
| Gd6          | O8Q          | 2.414(12)         | Gd15         | O13          | 2.484(13)         | Gd3          | O20          | 2.407(13)         |
| Gd6          | O24          | 2.447(12)         | Gd15         | O30          | 2.331(13)         | Gd3          | O22          | 2.316(13)         |
| Gd6          | O19          | 2.556(13)         | Gd15         | O12          | 2.464(13)         | Gd3          | O4Q          | 2.415(12)         |
| Gd6          | N28          | 2.561(16)         | Gd15         | N19          | 2.541(16)         | Gd3          | N16          | 2.551(17)         |
| Gd6          | N29          | 2.581(18)         | Gd15         | N20          | 2.481(19)         | Gd3          | N17          | 2.519(19)         |
| Gd9          | O17          | 2.546(12)         | Gd7          | O5Q          | 2.438(12)         | Gd14         | O20Q         | 2.389(12)         |
| Gd9          | O12Q         | 2.438(13)         | Gd7          | O9Q          | 2.374(12)         | Gd14         | O19Q         | 2.404(12)         |
| Gd9          | O11Q         | 2.386(13)         | Gd7          | O5           | 2.525(12)         | Gd14         | O17Q         | 2.452(12)         |
| Gd9          | O10Q         | 2.436(13)         | Gd7          | O17          | 2.412(12)         | Gd14         | O1           | 2.522(13)         |
| Gd9          | O16          | 2.446(13)         | Gd7          | O6Q          | 2.378(12)         | Gd14         | O29          | 2.497(14)         |
| Gd9          | O26          | 2.374(15)         | Gd7          | O8Q          | 2.445(11)         | Gd14         | O10          | 2.443(14)         |
| Gd9          | N26          | 2.56(2)           | Gd7          | O11Q         | 2.409(13)         | Gd14         | N1           | 2.571(16)         |
| Gd9          | N25          | 2.537(17)         | Gd7          | O10Q         | 2.420(12)         | Gd14         | N2           | 2.601(18)         |
| Gd4          | O7Q          | 2.348(12)         | Gd5          | O7Q          | 2.385(12)         | Gd8          | O9Q          | 2.356(12)         |
| Gd4          | O5Q          | 2.378(11)         | Gd5          | O5Q          | 2.329(11)         | Gd8          | O7           | 2.525(13)         |
| Gd4          | O2Q          | 2.358(11)         | Gd5          | O23          | 2.327(12)         | Gd8          | O12Q         | 2.395(13)         |
| Gd4          | O1Q          | 2.432(11)         | Gd5          | O5           | 2.500(13)         | Gd8          | O11Q         | 2.405(14)         |
| Gd4          | O3           | 2.508(13)         | Gd5          | O8Q          | 2.365(12)         | Gd8          | O6           | 2.494(15)         |
| Gd4          | O6Q          | 2.420(11)         | Gd5          | O4           | 2.404(13)         | Gd8          | O25          | 2.370(16)         |
| Gd4          | O4Q          | 2.359(12)         | Gd5          | N7           | 2.561(17)         | Gd8          | N10          | 2.549(17)         |
| Gd4          | O19          | 2.530(12)         | Gd5          | N8           | 2.517(18)         | Gd8          | N11          | 2.54(3)           |
| Gd13         | O18Q         | 2.447(11)         | Gd2          | O3Q          | 2.408(12)         | Gd11         | O15Q         | 2.380(14)         |
| Gd13         | O19Q         | 2.475(11)         | Gd2          | O1Q          | 2.411(13)         | Gd11         | O16Q         | 2.412(13)         |
| Gd13         | O16Q         | 2.394(12)         | Gd2          | O3           | 2.597(13)         | Gd11         | O13Q         | 2.370(12)         |
| Gd13         | O13          | 2.482(12)         | Gd2          | O4Q          | 2.385(12)         | Gd11         | O9           | 2.519(14)         |
| Gd13         | O17Q         | 2.385(13)         | Gd2          | O2           | 2.485(16)         | Gd11         | O8           | 2.451(15)         |
| Gd13         | O14Q         | 2.385(12)         | Gd2          | O21          | 2.540(19)         | Gd11         | O27          | 2.390(17)         |
| Gd13         | O13Q         | 2.441(13)         | Gd2          | N4           | 2.534(17)         | Gd11         | N14          | 2.51(3)           |
| Gd13         | O9           | 2.409(12)         | Gd2          | N5           | 2.533(18)         | Gd11         | N13          | 2.544(19)         |

**Table S10** Selected distances for **6**

| <b>Atom1</b> | <b>Atom2</b>     | <b>Distance/<br/>Å</b> | <b>Atom1</b> | <b>Atom2</b>     | <b>Distance/<br/>Å</b> |
|--------------|------------------|------------------------|--------------|------------------|------------------------|
| Gd1          | O3Q              | 2.320(8)               | Gd2          | O4Q              | 2.368(8)               |
| Gd1          | O1Q              | 2.303(9)               | Gd2          | O1               | 2.530(9)               |
| Gd1          | O1Q <sup>1</sup> | 2.340(8)               | Gd2          | N1               | 2.566(10)              |
| Gd1          | O13 <sup>1</sup> | 2.364(8)               | Gd2          | O2 <sup>2</sup>  | 2.432(8)               |
| Gd1          | O2Q <sup>1</sup> | 2.318(8)               | Gd3          | O3Q              | 2.347(8)               |
| Gd1          | O2Q              | 2.334(8)               | Gd3          | O1Q              | 2.395(9)               |
| Gd1          | O4Q <sup>1</sup> | 2.315(8)               | Gd3          | O13              | 2.524(9)               |
| Gd1          | O1               | 2.358(8)               | Gd3          | O4Q              | 2.356(8)               |
| Gd2          | O3Q              | 2.362(8)               | Gd3          | N4               | 2.554(12)              |
| Gd2          | O2Q              | 2.406(8)               | Gd3          | O15 <sup>1</sup> | 2.396(10)              |

**Table S11** Selected distances for **7**

| <b>Atom1</b> | <b>Atom2</b> | <b>Distance/Å</b> | <b>Atom1</b> | <b>Atom2</b> | <b>Distance/Å</b> | <b>Atom1</b> | <b>Atom2</b> | <b>Distance/Å</b> |
|--------------|--------------|-------------------|--------------|--------------|-------------------|--------------|--------------|-------------------|
| Gd3          | O2Q          | 2.433(13)         | Gd14         | O1           | 2.515(17)         | Gd9          | O17          | 2.556(15)         |
| Gd3          | O3Q          | 2.397(17)         | Gd14         | O20Q         | 2.417(18)         | Gd9          | O10Q         | 2.422(14)         |
| Gd3          | O11          | 2.570(18)         | Gd14         | O19Q         | 2.43(2)           | Gd9          | O16          | 2.469(15)         |
| Gd3          | O27          | 2.368(19)         | Gd14         | O10          | 2.41(3)           | Gd9          | O12Q         | 2.402(16)         |
| Gd3          | O4Q          | 2.423(17)         | Gd14         | N3           | 2.49(3)           | Gd9          | O23          | 2.477(17)         |
| Gd3          | O20          | 2.47(2)           | Gd14         | N2           | 2.56(3)           | Gd9          | N23          | 2.55(2)           |
| Gd3          | N18          | 2.48(3)           | Gd7          | O11Q         | 2.363(13)         | Gd9          | N24          | 2.50(2)           |
| Gd3          | N17          | 2.54(3)           | Gd7          | O6Q          | 2.376(13)         | Gd8          | O11Q         | 2.384(14)         |
| Gd2          | O3           | 2.492(14)         | Gd7          | O5Q          | 2.394(13)         | Gd8          | O9Q          | 2.350(14)         |
| Gd2          | O3Q          | 2.443(18)         | Gd7          | O17          | 2.533(16)         | Gd8          | O6           | 2.427(17)         |
| Gd2          | O1Q          | 2.454(15)         | Gd7          | O8Q          | 2.363(12)         | Gd8          | O24          | 2.331(18)         |
| Gd2          | O2           | 2.410(18)         | Gd7          | O9Q          | 2.365(14)         | Gd8          | O7           | 2.488(15)         |
| Gd2          | O4Q          | 2.363(16)         | Gd7          | O5           | 2.518(16)         | Gd8          | O12Q         | 2.366(15)         |
| Gd2          | O28          | 2.40(2)           | Gd7          | O10Q         | 2.393(14)         | Gd8          | N11          | 2.52(2)           |
| Gd2          | N5           | 2.59(3)           | Gd5          | O5Q          | 2.441(14)         | Gd8          | N12          | 2.53(2)           |
| Gd2          | N6           | 2.54(2)           | Gd5          | O8Q          | 2.408(13)         | Gd10         | O9Q          | 2.423(14)         |
| Gd12         | O15          | 2.524(16)         | Gd5          | O7Q          | 2.402(14)         | Gd10         | O10Q         | 2.384(15)         |
| Gd12         | O16Q         | 2.45(2)           | Gd5          | O5           | 2.565(17)         | Gd10         | O13Q         | 2.356(15)         |
| Gd12         | O14Q         | 2.447(15)         | Gd5          | O4           | 2.476(15)         | Gd10         | O15          | 2.428(15)         |
| Gd12         | O15Q         | 2.417(17)         | Gd5          | O26          | 2.438(17)         | Gd10         | O7           | 2.514(17)         |
| Gd12         | O14          | 2.45(2)           | Gd5          | N8           | 2.58(2)           | Gd10         | O12Q         | 2.456(16)         |
| Gd12         | O21          | 2.39(2)           | Gd5          | N9           | 2.51(2)           | Gd10         | O14Q         | 2.421(15)         |
| Gd12         | N27          | 2.55(3)           | Gd4          | O2Q          | 2.363(14)         | Gd10         | O15Q         | 2.423(16)         |
| Gd12         | N26          | 2.58(3)           | Gd4          | O6Q          | 2.421(13)         | Gd1          | O2Q          | 2.430(14)         |
| Gd15         | O13          | 2.487(19)         | Gd4          | O5Q          | 2.382(14)         | Gd1          | O3Q          | 2.389(17)         |
| Gd15         | O18Q         | 2.409(13)         | Gd4          | O7Q          | 2.441(13)         | Gd1          | O18Q         | 2.385(17)         |
| Gd15         | O12          | 2.42(2)           | Gd4          | O3           | 2.443(14)         | Gd1          | O11          | 2.435(19)         |
| Gd15         | O20Q         | 2.379(18)         | Gd4          | O19          | 2.511(16)         | Gd1          | O17Q         | 2.422(17)         |
| Gd15         | O19Q         | 2.367(19)         | Gd4          | O1Q          | 2.412(14)         | Gd1          | O1Q          | 2.356(15)         |
| Gd15         | N29          | 2.57(3)           | Gd4          | O4Q          | 2.396(15)         | Gd1          | O1           | 2.449(16)         |
| Gd15         | N30          | 2.52(2)           | Gd6          | O6Q          | 2.346(12)         | Gd1          | O20Q         | 2.413(18)         |
| Gd11         | O13Q         | 2.421(13)         | Gd6          | O8Q          | 2.392(14)         | Gd13         | O13Q         | 2.432(15)         |
| Gd11         | O16Q         | 2.420(18)         | Gd6          | O7Q          | 2.342(13)         | Gd13         | O16Q         | 2.368(18)         |
| Gd11         | O9           | 2.57(2)           | Gd6          | O25          | 2.318(16)         | Gd13         | O13          | 2.497(18)         |
| Gd11         | O15Q         | 2.408(19)         | Gd6          | O19          | 2.447(14)         | Gd13         | O18Q         | 2.432(16)         |
| Gd11         | O22          | 2.41(2)           | Gd6          | O18          | 2.438(15)         | Gd13         | O17Q         | 2.383(18)         |
| Gd11         | O8           | 2.455(19)         | Gd6          | N21          | 2.505(19)         | Gd13         | O9           | 2.436(19)         |
| Gd11         | N15          | 2.53(3)           | Gd6          | N20          | 2.53(2)           | Gd13         | O14Q         | 2.353(17)         |
| Gd11         | N14          | 2.53(3)           | Gd9          | O11Q         | 2.419(13)         | Gd13         | O19Q         | 2.440(18)         |
| Gd14         | O17Q         | 2.445(16)         |              |              |                   |              |              |                   |

**Table S12** Selected distances for **8**

| <b>Atom1</b> | <b>Atom2</b> | <b>Distance/Å</b> | <b>Atom1</b> | <b>Atom2</b> | <b>Distance/Å</b> | <b>Atom1</b> | <b>Atom2</b> | <b>Distance/Å</b> |
|--------------|--------------|-------------------|--------------|--------------|-------------------|--------------|--------------|-------------------|
| Er1          | O1           | 2.443(16)         | Er5          | O8Q          | 2.347(15)         | Er11         | O8           | 2.430(19)         |
| Er1          | O11          | 2.360(16)         | Er6          | O18          | 2.316(17)         | Er11         | O9           | 2.50(2)           |
| Er1          | O1Q          | 2.293(16)         | Er6          | O19          | 2.458(17)         | Er11         | O27          | 2.45(3)           |
| Er1          | O2Q          | 2.370(18)         | Er6          | N29          | 2.45(2)           | Er11         | N14          | 2.53(2)           |
| Er1          | O4Q          | 2.333(17)         | Er6          | N30          | 2.464(16)         | Er11         | N15          | 2.49(2)           |
| Er1          | O17Q         | 2.384(15)         | Er6          | O6Q          | 2.335(17)         | Er11         | O13Q         | 2.393(19)         |
| Er1          | O18Q         | 2.287(18)         | Er6          | O7Q          | 2.305(16)         | Er11         | O15Q         | 2.357(15)         |
| Er1          | O20Q         | 2.433(15)         | Er6          | O8Q          | 2.428(14)         | Er11         | O16Q         | 2.291(16)         |
| Er2          | O2           | 2.410(19)         | Er7          | O5           | 2.467(16)         | Er12         | O14          | 2.374(17)         |
| Er2          | O3           | 2.449(16)         | Er7          | O17          | 2.486(16)         | Er12         | O15          | 2.469(16)         |
| Er2          | O21          | 2.30(3)           | Er7          | O5Q          | 2.327(17)         | Er12         | O28          | 2.29(2)           |
| Er2          | N5           | 2.49(3)           | Er7          | O6Q          | 2.301(18)         | Er12         | N23          | 2.45(2)           |
| Er2          | N6           | 2.476(19)         | Er7          | O8Q          | 2.307(15)         | Er12         | N24          | 2.47(2)           |
| Er2          | O1Q          | 2.375(14)         | Er7          | O9Q          | 2.32(2)           | Er12         | O14Q         | 2.37(2)           |
| Er2          | O3Q          | 2.354(16)         | Er7          | O10Q         | 2.369(16)         | Er12         | O15Q         | 2.326(16)         |
| Er2          | O4Q          | 2.380(18)         | Er7          | O11Q         | 2.347(15)         | Er12         | O16Q         | 2.344(17)         |
| Er3          | O11          | 2.489(17)         | Er8          | O6           | 2.381(16)         | Er13         | O9           | 2.367(18)         |
| Er3          | O20          | 2.396(16)         | Er8          | O7           | 2.429(17)         | Er13         | O13          | 2.49(2)           |
| Er3          | O22          | 2.60(3)           | Er8          | N11          | 2.46(2)           | Er13         | O13Q         | 2.406(16)         |
| Er3          | N17          | 2.54(2)           | Er8          | N12          | 2.49(2)           | Er13         | O14Q         | 2.320(19)         |
| Er3          | N18          | 2.50(2)           | Er8          | O9Q          | 2.307(19)         | Er13         | O16Q         | 2.377(16)         |
| Er3          | O2Q          | 2.373(15)         | Er8          | O11Q         | 2.392(15)         | Er13         | O17Q         | 2.300(16)         |
| Er3          | O3Q          | 2.359(15)         | Er8          | O12Q         | 2.353(17)         | Er13         | O18Q         | 2.346(19)         |
| Er3          | O4Q          | 2.33(2)           | Er9          | O16          | 2.431(19)         | Er13         | O19Q         | 2.426(16)         |
| Er4          | O3           | 2.424(18)         | Er9          | O17          | 2.394(17)         | Er14         | O1           | 2.417(16)         |
| Er4          | O19          | 2.386(18)         | Er9          | O25          | 2.263(18)         | Er14         | O10          | 2.354(18)         |
| Er4          | O1Q          | 2.372(16)         | Er9          | N26          | 2.48(2)           | Er14         | N2           | 2.47(3)           |
| Er4          | O2Q          | 2.287(16)         | Er9          | N27          | 2.504(19)         | Er14         | N3           | 2.49(2)           |
| Er4          | O3Q          | 2.407(15)         | Er9          | O10Q         | 2.319(16)         | Er14         | O17Q         | 2.279(14)         |
| Er4          | O5Q          | 2.268(17)         | Er9          | O11Q         | 2.363(18)         | Er14         | O19Q         | 2.336(17)         |
| Er4          | O6Q          | 2.373(17)         | Er9          | O12Q         | 2.334(16)         | Er14         | O20Q         | 2.283(13)         |
| Er4          | O7Q          | 2.393(16)         | Er10         | O7           | 2.339(17)         | Er15         | O12          | 2.324(17)         |
| Er5          | O4           | 2.45(2)           | Er10         | O15          | 2.427(16)         | Er15         | O13          | 2.441(19)         |
| Er5          | O5           | 2.438(16)         | Er10         | O9Q          | 2.377(16)         | Er15         | N20          | 2.46(2)           |
| Er5          | O23          | 2.277(15)         | Er10         | O10Q         | 2.269(17)         | Er15         | N21          | 2.49(2)           |
| Er5          | N8           | 2.46(2)           | Er10         | O12Q         | 2.402(15)         | Er15         | O18Q         | 2.307(16)         |
| Er5          | N9           | 2.449(18)         | Er10         | O13Q         | 2.301(17)         | Er15         | O19Q         | 2.321(16)         |
| Er5          | O5Q          | 2.341(16)         | Er10         | O14Q         | 2.37(2)           | Er15         | O20Q         | 2.388(16)         |
| Er5          | O7Q          | 2.336(15)         | Er10         | O15Q         | 2.349(14)         |              |              |                   |

**Table S13** Selected distances for **9**

| <b>Atom1</b> | <b>Atom2</b>     | <b>Distance</b><br>/Å | <b>Atom1</b> | <b>Atom2</b>      | <b>Distance</b><br>/Å |
|--------------|------------------|-----------------------|--------------|-------------------|-----------------------|
| Er1          | O1               | 2.454(9)              | Er5          | O3                | 2.420(9)              |
| Er1          | O13              | 2.354(9)              | Er5          | O8                | 2.381(9)              |
| Er1          | N2               | 2.480(12)             | Er5          | O3Q               | 2.365(8)              |
| Er1          | N3               | 2.478(11)             | Er5          | O4Q               | 2.326(8)              |
| Er1          | O1Q              | 2.294(8)              | Er5          | O6Q               | 2.397(9)              |
| Er1          | O2Q <sup>1</sup> | 2.373(9)              | Er5          | O7Q               | 2.298(8)              |
| Er1          | O2Q              | 2.292(8)              | Er5          | O9Q <sup>1</sup>  | 2.407(9)              |
| Er2          | O1               | 2.460(9)              | Er5          | O10Q <sup>1</sup> | 2.413(8)              |
| Er2          | O14              | 2.406(8)              | Er6          | O5 <sup>1</sup>   | 2.429(9)              |
| Er2          | O1Q <sup>1</sup> | 2.313(8)              | Er6          | O5                | 2.429(9)              |
| Er2          | O1Q              | 2.391(8)              | Er6          | O7Q <sup>1</sup>  | 2.351(9)              |
| Er2          | O2Q              | 2.433(9)              | Er6          | O7Q               | 2.351(9)              |
| Er2          | O3Q              | 2.330(8)              | Er6          | O8Q               | 2.352(8)              |
| Er2          | O4Q              | 2.353(8)              | Er6          | O8Q <sup>1</sup>  | 2.352(8)              |
| Er2          | O5Q              | 2.322(8)              | Er6          | O9Q <sup>1</sup>  | 2.295(8)              |
| Er3          | O7               | 2.428(9)              | Er6          | O9Q               | 2.295(8)              |
| Er3          | O9               | 2.456(11)             | Er7          | O4                | 2.420(9)              |
| Er3          | O14              | 2.467(8)              | Er7          | O5                | 2.434(8)              |
| Er3          | N20              | 2.522(11)             | Er7          | O11               | 2.249(9)              |
| Er3          | N21              | 2.502(11)             | Er7          | N8                | 2.468(12)             |
| Er3          | O4Q              | 2.392(8)              | Er7          | N9                | 2.466(12)             |
| Er3          | O5Q              | 2.329(9)              | Er7          | O7Q               | 2.314(8)              |
| Er3          | O6Q              | 2.354(9)              | Er7          | O8Q               | 2.328(9)              |
| Er4          | O2               | 2.388(9)              | Er7          | O10Q <sup>1</sup> | 2.348(9)              |
| Er4          | O3               | 2.464(9)              | Er8          | O6                | 2.351(9)              |
| Er4          | O10              | 2.261(9)              | Er8          | O8 <sup>1</sup>   | 2.418(9)              |
| Er4          | N5               | 2.454(11)             | Er8          | N11               | 2.468(13)             |
| Er4          | N6               | 2.468(10)             | Er8          | N12               | 2.467(11)             |
| Er4          | O3Q              | 2.300(8)              | Er8          | O8Q <sup>1</sup>  | 2.389(8)              |
| Er4          | O5Q              | 2.346(9)              | Er8          | O9Q               | 2.312(8)              |
| Er4          | O6Q              | 2.345(9)              | Er8          | O10Q              | 2.335(9)              |



**Table S14** Selected distances for **10**

| Atom1 | Atom2            | Distance/Å | Atom1 | Atom2            | Distance/Å |
|-------|------------------|------------|-------|------------------|------------|
| Er1   | O1Q <sup>1</sup> | 2.332(8)   | Er2   | O3               | 2.407(7)   |
| Er1   | O3Q <sup>2</sup> | 2.343(8)   | Er2   | O2Q              | 2.330(8)   |
| Er1   | O3Q              | 2.337(7)   | Er2   | O4 <sup>2</sup>  | 2.535(8)   |
| Er1   | O4Q              | 2.336(7)   | Er2   | N4               | 2.565(10)  |
| Er1   | O4Q <sup>2</sup> | 2.315(7)   | Er3   | O1Q              | 2.319(7)   |
| Er1   | O2               | 2.343(7)   | Er3   | O3Q <sup>2</sup> | 2.343(8)   |
| Er1   | O2Q              | 2.319(7)   | Er3   | O2               | 2.509(8)   |
| Er1   | O4               | 2.333(7)   | Er3   | O2Q              | 2.319(7)   |
| Er2   | O1Q              | 2.326(7)   | Er3   | O1               | 2.390(9)   |
| Er2   | O4Q <sup>2</sup> | 2.369(7)   | Er3   | N1               | 2.528(10)  |

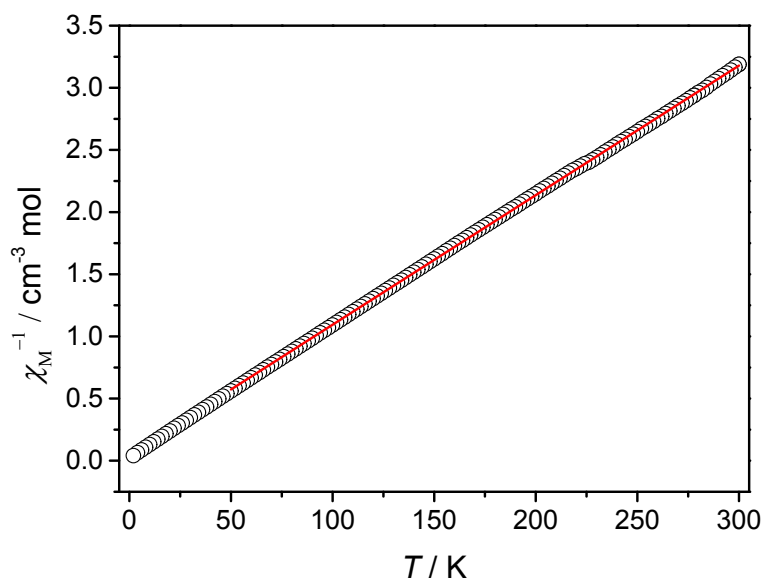

**Fig. S4** The  $\chi_M^{-1}$  vs  $T$  and the Curie-Weiss linear fit for **6**.

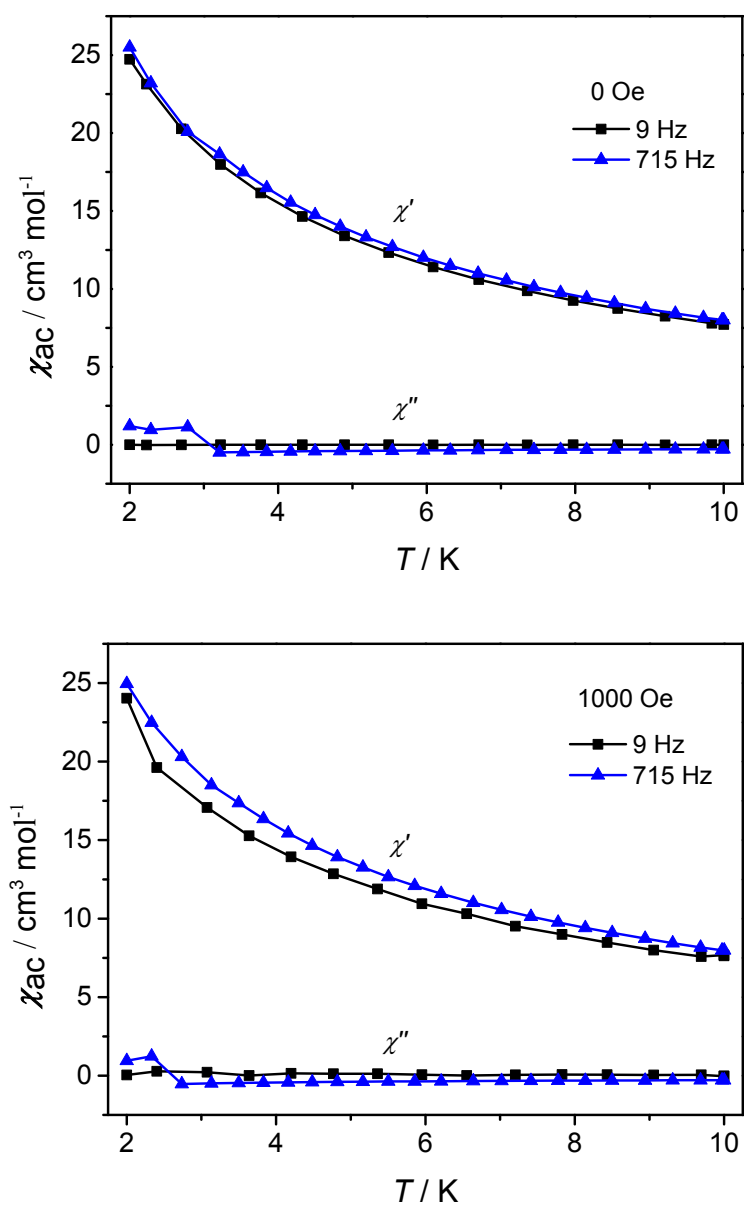

**Fig. S5** The temperature dependence of in-phase ( $\chi'$ ) and out-of-phase ( $\chi''$ ) ac susceptibility data in 0 Oe and 1000 Oe dc field for **6**.

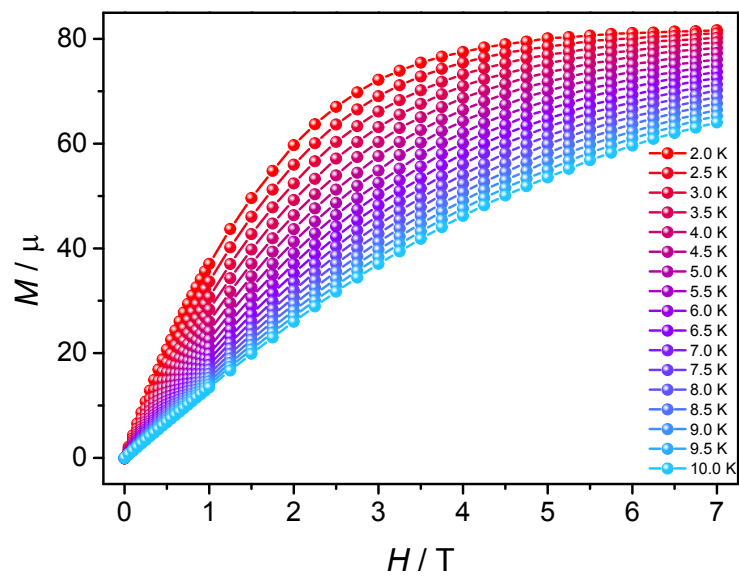

**Fig. S6** Field-dependent experimental magnetization plots for **6** at the indicated temperatures.
